# Supplementary material for: Changes in conformational dynamics of basic side chains upon protein–DNA association
Source: PubMed Central journal article supplement (PMC5001603; doi:10.1093/nar/gkw531), 2016-06-10
Supplement: supp_gkw531_nar-00877-h-2016-File006.pdf [file supp_gkw531_nar-00877-h-2016-File006.pdf]

## SUPPORTING INFORMATION

### Changes in conformational dynamics of basic side chains upon protein-DNA association

Alexandre Esadze, Chuanying Chen, Levani Zandarashvili, Sourav Roy,  
B. Montgomery Pettitt, and Junji Iwahara

**Table S1.**  $^{15}\text{N}$  NMR relaxation data for the Arg side-chain  $\text{N}_\epsilon\text{-H}_\epsilon$  groups of the free Egr-1 protein at 25°C.

| Arg $\text{N}_\epsilon\text{-H}_\epsilon$ | $^{15}\text{N}_\epsilon R_1$ ( $\text{s}^{-1}$ ) | $^{15}\text{N}_\epsilon R_1$ ( $\text{s}^{-1}$ ) | $^{15}\text{N}_\epsilon R_2$ ( $\text{s}^{-1}$ ) | $\{^1\text{H-}\}^{15}\text{N}_\epsilon$ NOE | $\{^1\text{H-}\}^{15}\text{N}_\epsilon$ NOE |
|-------------------------------------------|--------------------------------------------------|--------------------------------------------------|--------------------------------------------------|---------------------------------------------|---------------------------------------------|
|                                           | 600 MHz                                          | 750 MHz                                          | 750 MHz                                          | 600 MHz                                     | 750 MHz                                     |
| R3                                        | 0.71 ± 0.01                                      | 0.62 ± 0.01                                      | 2.20 ± 0.13                                      | -0.93 ± 0.03                                | -0.69 ± 0.05                                |
| R14                                       | 1.01 ± 0.01                                      | 0.85 ± 0.01                                      | 2.79 ± 0.11                                      | -0.12 ± 0.02                                | 0.00 ± 0.03                                 |
| R15                                       | 1.11 ± 0.01                                      | 0.90 ± 0.01                                      | 4.02 ± 0.07                                      | -0.04 ± 0.02                                | 0.06 ± 0.03                                 |
| R18                                       | 0.86 ± 0.01                                      | 0.74 ± 0.01                                      | 2.65 ± 0.08                                      | -0.52 ± 0.02                                | -0.37 ± 0.03                                |
| R24                                       | 0.83 ± 0.01                                      | 0.75 ± 0.01                                      | 2.70 ± 0.14                                      | -0.67 ± 0.03                                | -0.36 ± 0.04                                |
| R27                                       | 0.71 ± 0.01                                      | 0.62 ± 0.01                                      | 2.32 ± 0.09                                      | -0.89 ± 0.02                                | -0.66 ± 0.03                                |
| R38                                       | 0.64 ± 0.01                                      | 0.57 ± 0.01                                      | 2.45 ± 0.09                                      | -0.83 ± 0.02                                | -0.64 ± 0.03                                |
| R42                                       | 0.88 ± 0.01                                      | 0.77 ± 0.01                                      | 3.53 ± 0.16                                      | -0.27 ± 0.03                                | -0.18 ± 0.05                                |
| R46                                       | 0.98 ± 0.01                                      | 0.82 ± 0.01                                      | 4.07 ± 0.10                                      | -0.07 ± 0.02                                | 0.01 ± 0.03                                 |
| R55                                       | 0.69 ± 0.01                                      | 0.59 ± 0.01                                      | 2.57 ± 0.10                                      | -0.80 ± 0.02                                | -0.60 ± 0.03                                |
| R70                                       | 0.85 ± 0.01                                      | 0.77 ± 0.02                                      | 3.12 ± 0.23                                      | -0.32 ± 0.03                                | -0.21 ± 0.05                                |
| R74                                       | 0.85 ± 0.01                                      | 0.72 ± 0.01                                      | 3.13 ± 0.07                                      | -0.52 ± 0.02                                | -0.36 ± 0.03                                |
| R78                                       | 1.47 ± 0.08                                      | 1.12 ± 0.08                                      | 3.57 ± 0.66                                      | 0.24 ± 0.06                                 | 0.32 ± 0.09                                 |
| R80                                       | 0.85 ± 0.01                                      | 0.73 ± 0.02                                      | 2.17 ± 0.23                                      | -0.58 ± 0.03                                | -0.35 ± 0.05                                |
| R87                                       | 0.48 ± 0.01                                      | 0.45 ± 0.01                                      | 1.67 ± 0.07                                      | -1.66 ± 0.03                                | -1.31 ± 0.04                                |

**Table S2.**  $^{15}\text{N}$  NMR relaxation data for Lys side-chain  $\text{NH}_3^+$  groups of the free Egr-1 protein at 5°C.

| Lys $\text{NH}_3^+$ | $^{15}\text{N}_\zeta R_1$ ( $\text{s}^{-1}$ ) | $^{15}\text{N}_\zeta R_1$ ( $\text{s}^{-1}$ ) | $^{15}\text{N}_\zeta R_{2,\text{ini}}$ ( $\text{s}^{-1}$ ) <sup>a)</sup> | $\{^1\text{H-}\}^{15}\text{N}_\zeta$ NOE | $\{^1\text{H-}\}^{15}\text{N}_\zeta$ NOE |
|---------------------|-----------------------------------------------|-----------------------------------------------|--------------------------------------------------------------------------|------------------------------------------|------------------------------------------|
|                     | 600 MHz                                       | 800 MHz                                       | 800 MHz                                                                  | 600 MHz                                  | 800 MHz                                  |
| K33                 | 0.47 ± 0.01                                   | 0.43 ± 0.01                                   | 1.19 ± 0.04                                                              | -2.88 ± 0.03                             | -2.78 ± 0.03                             |
| K61                 | 0.51 ± 0.01                                   | 0.46 ± 0.01                                   | 1.31 ± 0.04                                                              | -2.88 ± 0.03                             | -2.81 ± 0.03                             |
| K71                 | 0.47 ± 0.01                                   | 0.44 ± 0.01                                   | 1.14 ± 0.01                                                              | -2.69 ± 0.02                             | -2.53 ± 0.01                             |
| K79                 | 0.42 ± 0.01                                   | 0.38 ± 0.01                                   | 1.08 ± 0.07                                                              | -2.63 ± 0.05                             | -2.64 ± 0.05                             |
| K83                 | 0.47 ± 0.01                                   | 0.44 ± 0.01                                   | 1.07 ± 0.06                                                              | -2.87 ± 0.05                             | -2.64 ± 0.04                             |
| K89                 | 0.34 ± 0.01                                   | 0.33 ± 0.01                                   | 0.66 ± 0.01                                                              | -3.15 ± 0.02                             | -2.73 ± 0.01                             |

<sup>a)</sup> The initial rate for intrinsically bi-exponential  $^{15}\text{N}$  transverse relaxation of  $\text{NH}_3^+$  (see Esadze *et al.* [2011] *J Am Chem Soc* 133, 909-13).

Corresponding  $^{15}\text{N}$  relaxation data for the Lys  $\text{NH}_3^+$  groups of the Egr-1-DNA complex at 10°C were reported in our previous paper: Chen *et al.* [2015] *J Phys Chem Lett* 6, 2733-7.

**Table S3.**  $^{15}\text{N}$  NMR relaxation data for the Arg side-chain  $\text{N}_\epsilon\text{-H}_\epsilon$  groups of the Egr-1–DNA complex at 25°C.

| Arg $\text{N}_\epsilon\text{-H}_\epsilon$ | $^{15}\text{N}_\epsilon R_1$ ( $\text{s}^{-1}$ )<br>600 MHz | $^{15}\text{N}_\epsilon R_1$ ( $\text{s}^{-1}$ )<br>750 MHz | $^{15}\text{N}_\epsilon R_2$ ( $\text{s}^{-1}$ )<br>750 MHz | $\{^1\text{H}\}\text{N}_\epsilon$ NOE<br>600 MHz | $\{^1\text{H}\}\text{N}_\epsilon$ NOE<br>750 MHz |
|-------------------------------------------|-------------------------------------------------------------|-------------------------------------------------------------|-------------------------------------------------------------|--------------------------------------------------|--------------------------------------------------|
| R3                                        | $0.79 \pm 0.01$                                             | $0.66 \pm 0.01$                                             | $7.34 \pm 0.11$                                             | $-0.21 \pm 0.02$                                 | $-0.02 \pm 0.02$                                 |
| R14                                       | $0.93 \pm 0.01$                                             | $0.79 \pm 0.01$                                             | $5.96 \pm 0.06$                                             | $-0.21 \pm 0.01$                                 | $-0.04 \pm 0.02$                                 |
| R15                                       | $0.88 \pm 0.01$                                             | $0.69 \pm 0.01$                                             | $6.79 \pm 0.07$                                             | $0.05 \pm 0.01$                                  | $0.09 \pm 0.02$                                  |
| R18                                       | $0.82 \pm 0.05$                                             | $0.51 \pm 0.03$                                             | $20.3 \pm 0.94$                                             | $0.65 \pm 0.05$                                  | $0.68 \pm 0.10$                                  |
| R24                                       | $0.79 \pm 0.03$                                             | $0.58 \pm 0.03$                                             | $15.6 \pm 1.2$                                              | $0.69 \pm 0.07$                                  | $0.76 \pm 0.12$                                  |
| R27                                       | $0.70 \pm 0.02$                                             | $0.51 \pm 0.01$                                             | $15.8 \pm 0.5$                                              | $0.68 \pm 0.04$                                  | $0.65 \pm 0.06$                                  |
| R38                                       | $0.53 \pm 0.01$                                             | $0.47 \pm 0.01$                                             | $2.45 \pm 0.04$                                             | $-1.01 \pm 0.01$                                 | $-0.73 \pm 0.02$                                 |
| R42                                       | $0.88 \pm 0.01$                                             | $0.67 \pm 0.01$                                             | $11.7 \pm 0.14$                                             | $0.26 \pm 0.02$                                  | $0.28 \pm 0.03$                                  |
| R46                                       | $0.88 \pm 0.05$                                             | $0.59 \pm 0.01$                                             | $25.9 \pm 2.4$                                              | $0.68 \pm 0.08$                                  | $0.62 \pm 0.13$                                  |
| R55                                       | $0.72 \pm 0.02$                                             | $0.53 \pm 0.02$                                             | $18.4 \pm 0.5$                                              | $0.49 \pm 0.04$                                  | $0.43 \pm 0.06$                                  |
| R70                                       | $0.82 \pm 0.01$                                             | $0.71 \pm 0.01$                                             | $5.96 \pm 0.10$                                             | $-0.28 \pm 0.01$                                 | $-0.13 \pm 0.02$                                 |
| R74                                       | $0.80 \pm 0.03$                                             | $0.57 \pm 0.07$                                             | $29.1 \pm 4.3$                                              | $0.65 \pm 0.08$                                  | $0.40 \pm 0.15$                                  |
| R78                                       | $0.91 \pm 0.02$                                             | $0.67 \pm 0.02$                                             | $11.2 \pm 0.4$                                              | $0.39 \pm 0.03$                                  | $0.52 \pm 0.05$                                  |
| R80                                       | $0.83 \pm 0.02$                                             | $0.59 \pm 0.02$                                             | $17.7 \pm 0.6$                                              | $0.41 \pm 0.05$                                  | $0.49 \pm 0.08$                                  |
| R87                                       | $0.51 \pm 0.01$                                             | $0.47 \pm 0.01$                                             | $2.05 \pm 0.06$                                             | $-1.38 \pm 0.02$                                 | $-1.08 \pm 0.03$                                 |

**Table S4.** Molecular rotational diffusion parameters for the free Egr-1 protein and the Egr-1–DNA complex.<sup>a)</sup>

|                                  | $\tau_{r,eff}$ (ns) <sup>b)</sup> | $D_{\parallel} / D_{\perp}$ <sup>b)</sup> |
|----------------------------------|-----------------------------------|-------------------------------------------|
| Free Egr-1 at 5°C <sup>c)</sup>  |                                   |                                           |
| ZF1                              | $8.23 \pm 0.02$                   | $1.69 \pm 0.02$                           |
| ZF2                              | $10.51 \pm 0.05$                  | $1.95 \pm 0.02$                           |
| ZF3                              | $8.42 \pm 0.02$                   | $2.03 \pm 0.02$                           |
| Free Egr-1 at 25°C <sup>c)</sup> |                                   |                                           |
| ZF1                              | $4.72 \pm 0.03$                   | $1.53 \pm 0.03$                           |
| ZF2                              | $6.10 \pm 0.04$                   | $1.68 \pm 0.03$                           |
| ZF3                              | $4.66 \pm 0.02$                   | $2.34 \pm 0.02$                           |
| -----                            |                                   |                                           |
| Complex at 25°C                  |                                   |                                           |
| ZF1-ZF2-ZF3                      | $13.91 \pm 0.05$                  | $1.59 \pm 0.02$                           |

<sup>a)</sup> Determined from backbone  $^{15}\text{N}$   $R_1$  and  $R_2$  relaxation rates for the secondary-structure regions.

<sup>b)</sup> Parameters for the axially symmetric rotational diffusion model. The effective molecular rotational correlation time  $\tau_{r,eff}$  and the anisotropy  $r$  are given by  $(2 D_{\parallel} + 4 D_{\perp})^{-1}$ .

<sup>c)</sup> Because the three zinc-finger (ZF) domains tumble almost independently in the free state, the fitting calculation was performed individually for each domain. The larger value  $\tau_{r,eff}$  for ZF2 is likely due to restriction via two domains, as discussed in Brüschweiler *et al.* (1995) *Science* 268, 886-9.

**Table S5.** Frequencies of direct contacts <sup>a)</sup> for the Arg guanidino and Lys amino groups observed in 600-ns MD trajectories for the free Egr-1 protein and the Egr-1-DNA complex.

| a.a. | Free protein                                                                               | Complex                                                                                      | a.a. | Free protein                                                                               | Complex                                                                                                |
|------|--------------------------------------------------------------------------------------------|----------------------------------------------------------------------------------------------|------|--------------------------------------------------------------------------------------------|--------------------------------------------------------------------------------------------------------|
| R3   | NH2 - E2: 0.47<br>NE - E2: 0.08                                                            | NH2 - E2: 0.14<br>NE - S17: 0.17<br>NH1 - Gua8: 0.38<br>NH1 - Cyt9: 0.07<br>NH2 - Gua8: 0.51 | R14  | --                                                                                         | NH1 - Gua7: 0.75<br>NH2 - Gua7: 0.08                                                                   |
| R15  | NH1 - E2: 0.13<br>NH1 - D13: 0.32<br>NH2 - E2: 0.15<br>NH2 - D13: 0.27<br>NE - E2: 0.05    | NH1 - E2: 0.20<br>NH1 - D13: 0.15<br>NH2 - E2: 0.24<br>NH2 - D13: 0.12                       | R18  | NH2 - D20: 0.87<br>NH2 - E21: 0.11<br>NE - D20: 0.35                                       | NH2 - D20: 1.06<br>NE - D20: 0.48<br>NH1 - N7,Gua10: 0.87<br>NH2 - O6,Gua10: 0.32                      |
| R24  | NH1 - D20: 0.48<br>NH2 - D20: 0.57<br>NH2 - E21: 0.78<br>NE - E21: 0.20                    | NH2 - E21: 0.42<br>NH1 - O6,Gua8: 0.61<br>NH2 - N7,Gua8: 0.83                                | R27  | NH1 - P34: 0.43                                                                            | NH1 - Ade52: 0.18<br>NH2 - Ade52: 0.68                                                                 |
| R38  | --                                                                                         | --                                                                                           | R42  | --                                                                                         | NH1 - Gua4: 0.73<br>NH2 - Gua4: 0.58                                                                   |
| R46  | NH2 - D48: 0.96<br>NE - D48: 0.43                                                          | NH2 - D48: 1.01<br>NE - D48: 0.45<br>NH1 - N7,Gua7: 0.85<br>NH2 - O6,Gua7: 0.55              | R55  | NH2 - E60: 0.17<br>NE - E60: 0.15                                                          | NE - E60: 0.20<br>NH1 - Cyt55: 0.97<br>NH2 - Cyt55: 0.77                                               |
| R70  | --                                                                                         | NH1 - Gua2: 0.42<br>NH2 - Gua2: 0.56                                                         | R74  | NH2 - D48: 0.08<br>NH2 - D76: 0.67<br>NH2 - E77: 0.10<br>NE - D76: 0.30                    | NH2 - D76: 1.01<br>NE - D76: 0.59<br>NH1 - N7,Gua4: 0.82<br>NH2 - O6,Gua4: 0.41<br>NH2 - N7,Gua4: 0.11 |
| R78  | NH1 - D66: 0.25<br>NH1 - T82: 0.37<br>NH2 - D66: 0.60<br>NH2 - A64: 0.15<br>NE - A64: 0.14 | NH1 - T82: 0.12<br>NH2 - S75: 0.45<br>NH1 - Cyt57: 0.29<br>NH2 - Cyt57: 0.82                 | R80  | NH1 - D76: 0.19<br>NH1 - E77: 0.14<br>NH2 - D76: 0.34<br>NH2 - E77: 0.92<br>NE - E77: 0.26 | NH2 - E77: 1.08<br>NH1 - O6,Gua2: 0.09<br>NH2 - Gua2: 0.78<br>NH1 - N7,Gua2: 0.11                      |
| R87  | --                                                                                         | --                                                                                           |      |                                                                                            |                                                                                                        |
| K33  | --                                                                                         | --                                                                                           | K61  | --                                                                                         | --                                                                                                     |
| K71  | E60: 0.35                                                                                  | --                                                                                           | K79  | --                                                                                         | Cyt57: 0.34<br>Ade58: 0.19                                                                             |
| K83  | --                                                                                         | Ade58: 0.51                                                                                  | K89  | --                                                                                         | --                                                                                                     |

<sup>a)</sup> Either a strong salt bridge (SB) or a hydrogen bond (HB). The geometric criteria for a HB between donor (D) and acceptor (A) atoms are 1) the A...H distance < 2.3 Å; 2) the A...D distance < 3.2 Å; and 3) the A...H-D angle being between 130° and 180°. A SB contact is defined as a state with the distance between two charged atoms being less than 2.8 Å. The frequency of each contact is defined as the sum of the occupancies of the equivalent contacts (e.g. those between Arg NH1 and ASP OD1/OD2 atoms), and therefore can exceed 1.0.

**Table S6.** Mean lifetimes of the direct contacts with DNA for the Arg guanidino and Lys amino groups in the Egr-1-DNA complex (see Table S5).

|                          |     |     |     |     |     |     |     |
|--------------------------|-----|-----|-----|-----|-----|-----|-----|
|                          | R3  | R14 | R27 | R42 | R55 | R70 | R80 |
| $\tau$ (ps) <sup>a</sup> | 75  | 70  | 470 | 64  | 249 | 36  | 43  |
|                          | R18 | R24 | R46 | R74 | K33 | K79 | K83 |
| $\tau$ (ps) <sup>a</sup> | 2   | 2   | 2   | 2   | 7   | 20  | 19  |

<sup>a</sup>. Mean lifetimes of the contact states. These were estimated by a survival correlation function:

$$S(t) = \langle h(t_0)H(t_0+t) \rangle / \langle h(t_0) \rangle \quad (1)$$

where  $h(t_0)$  is 1 if a contact state is formed at a time origin  $t_0$ , and 0 otherwise.  $H(t_0+t)$  is 1 if a contact state remains intact during the period of time  $t$ .  $S(t)$  provides a strict definition of the lifetime of a contact state, and it is “history – dependent”.  $S(t)$  was best described by a double exponential model:

$$S(t) = (1 - W)\exp(-t / \tau_{ip-f}) + W\exp(-t / \tau_{ip-s}), \quad (2)$$

where  $\tau_{ip-f}$  and  $\tau_{ip-s}$  are the fast and slow correlation times of an ion-pair state, respectively, and  $W$  gives the weight of the slow relaxation. It should be noted that the value of the correlation time can be sensitive to the sampling frequency. A long interval between sampled configurations will lead to missing events where a contact is broken for a short time and reform subsequently. In the current work, we sampled every 0.1 ps.

**Table S7.** Computational order parameters for Arg side-chain  $N_\epsilon$ - $H_\epsilon$  and Lys side-chain  $C_\epsilon$ - $N_\zeta$  bond vectors calculated from the MD trajectories for the free Egr-1 and the Egr-1–DNA complex.

| Bonds                           | $S^2(\text{free})^{\text{a)}}$ | $S^2(\text{complex})^{\text{b)}}$ |
|---------------------------------|--------------------------------|-----------------------------------|
| Arg $N_\epsilon$ - $H_\epsilon$ |                                |                                   |
| R3                              | 0.24                           | 0.33                              |
| R14                             | 0.23                           | 0.15                              |
| R15                             | 0.09                           | 0.13                              |
| R18                             | 0.42                           | 0.91                              |
| R24                             | 0.67                           | 0.78                              |
| R27                             | 0.65                           | 0.60                              |
| R38                             | 0.07                           | 0.24                              |
| R42                             | 0.26                           | 0.69                              |
| R46                             | 0.63                           | 0.89                              |
| R55                             | 0.55                           | 0.88                              |
| R70                             | 0.19                           | 0.35                              |
| R74                             | 0.38                           | 0.89                              |
| R78                             | 0.37                           | 0.83                              |
| R80                             | 0.30                           | 0.36                              |
| R87                             | 0.08                           | 0.23                              |
| Lys $C_\epsilon$ - $N_\zeta$    |                                |                                   |
| K33                             | 0.07                           | 0.09                              |
| K61                             | 0.05                           | 0.21                              |
| K71                             | 0.04                           | 0.05                              |
| K79                             | 0.39                           | 0.20                              |
| K83                             | 0.09                           | 0.45                              |
| K89                             | 0.00                           | 0.03                              |

<sup>a)</sup> Calculated from a 600-ns MD trajectory for the free Egr-1 protein. The molecular frame was defined individually for each zinc-finger domain to account for independent domain motions.

<sup>b)</sup> Calculated from a 600-ns MD trajectory for the Egr-1–DNA complex. The molecular frame was defined for the entire complex.

**Table S8.** Side-chain conformational entropy calculated for Arg and Lys residues from the MD trajectories for the free Egr-1 and the Egr-1–DNA complex.

| Side chains | $S_{cof}(\text{free})$ [J/K/mol] <sup>a)</sup> | $S_{cof}(\text{complex})$ [J/K/mol] <sup>a)</sup> |
|-------------|------------------------------------------------|---------------------------------------------------|
| Arg         |                                                |                                                   |
| R3          | 143.7 ± 0.9                                    | 139.9 ± 1.3                                       |
| R14         | 140.6 ± 1.5                                    | 143.2 ± 1.1                                       |
| R15         | 145.6 ± 0.9                                    | 146.4 ± 1.6                                       |
| R18         | 152.2 ± 0.4                                    | 143.8 ± 1.5                                       |
| R24         | 134.7 ± 1.2                                    | 122.9 ± 1.5                                       |
| R27         | 131.9 ± 1.2                                    | 135.8 ± 2.5                                       |
| R38         | 147.6 ± 0.6                                    | 144.7 ± 0.8                                       |
| R42         | 140.4 ± 0.9                                    | 125.7 ± 1.3                                       |
| R46         | 143.8 ± 1.1                                    | 130.3 ± 1.7                                       |
| R55         | 126.5 ± 1.1                                    | 117.9 ± 1.9                                       |
| R70         | 142.1 ± 1.1                                    | 125.4 ± 1.8                                       |
| R74         | 151.0 ± 0.5                                    | 143.0 ± 1.0                                       |
| R78         | 132.4 ± 1.1                                    | 123.9 ± 1.5                                       |
| R80         | 137.1 ± 1.0                                    | 118.5 ± 2.1                                       |
| R87         | 146.9 ± 0.3                                    | 142.1 ± 1.4                                       |
| -----       |                                                |                                                   |
| Lys         |                                                |                                                   |
| K33         | 140.9 ± 0.8                                    | 138.8 ± 1.6                                       |
| K61         | 137.3 ± 0.6                                    | 137.7 ± 1.4                                       |
| K71         | 154.8 ± 0.2                                    | 153.2 ± 0.6                                       |
| K79         | 142.4 ± 0.2                                    | 134.3 ± 1.5                                       |
| K83         | 150.9 ± 0.2                                    | 150.0 ± 0.6                                       |
| K89         | 151.9 ± 0.5                                    | 148.2 ± 0.7                                       |

<sup>a)</sup> Uncertainties correspond to standard errors estimated from independent 50 - ns blocks of MD trajectories.
